# Supplementary material for: Nitrate anion-mediated morphology control of Bi5O7NO3 and its photocatalytic activity
Source: Royal Society of Chemistry journal article supplement (doi:10.1039/c3ce41875h), 2013-01-01
Supplement: c3ce41875h.pdf [file c3ce41875h.pdf]

## Nitrate anion-mediated morphologies control of $\text{Bi}_5\text{O}_7\text{NO}_3$

### and its photocatalytic activity

Longzhu Zhang, Lingjun Chou<sup>1</sup> and Xinheng Li<sup>1,2\*</sup>

<sup>1</sup> The State Key Laboratory for Oxo Synthesis and Selective Oxidation, Lanzhou Institute of

Chemical Physics, Chinese Academy of Sciences, Lanzhou 730000, China.

<sup>2</sup> Suzhou Institute of Nano-tech and Nano-bionics, Chinese Academy of Sciences, Suzhou

215123, China.

E-mail: [xinhengli@licp.cas.cn](mailto:xinhengli@licp.cas.cn); [xhli2012@sinano.ac.cn](mailto:xhli2012@sinano.ac.cn)

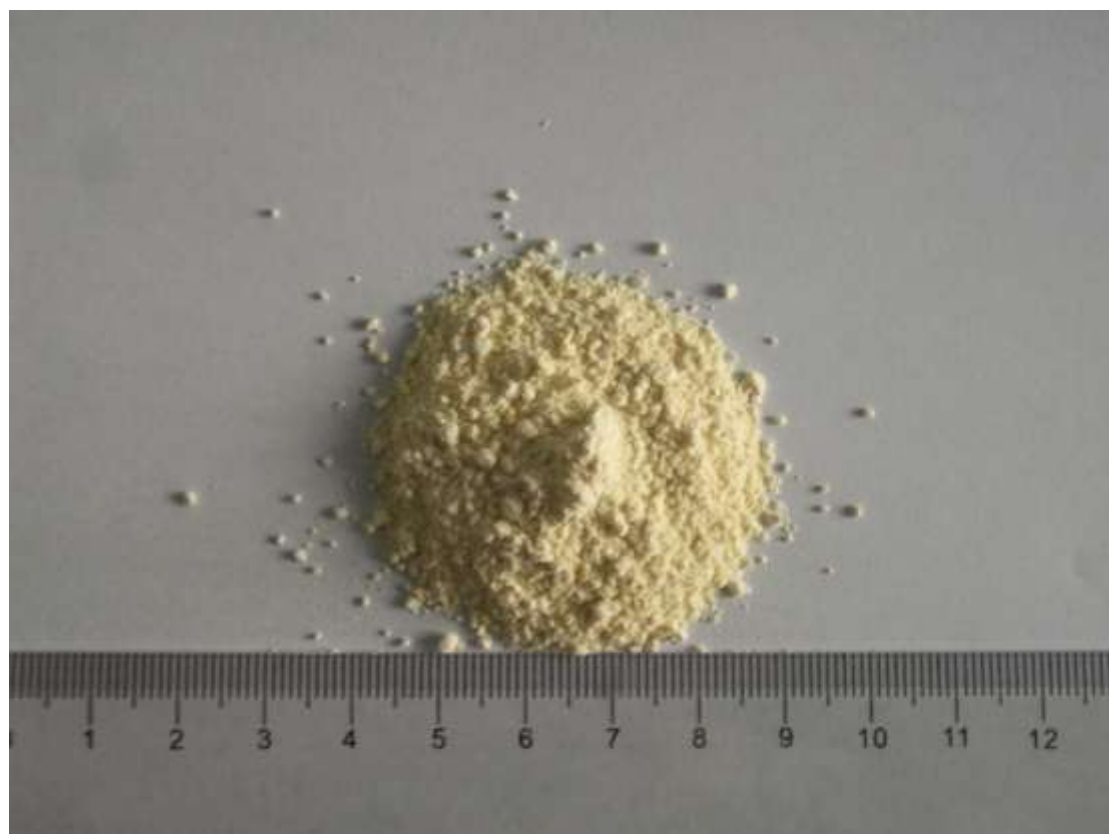

Fig. S1 Photographic image of the gram-scaled nanosheets of  $\text{Bi}_5\text{O}_7\text{NO}_3$ .

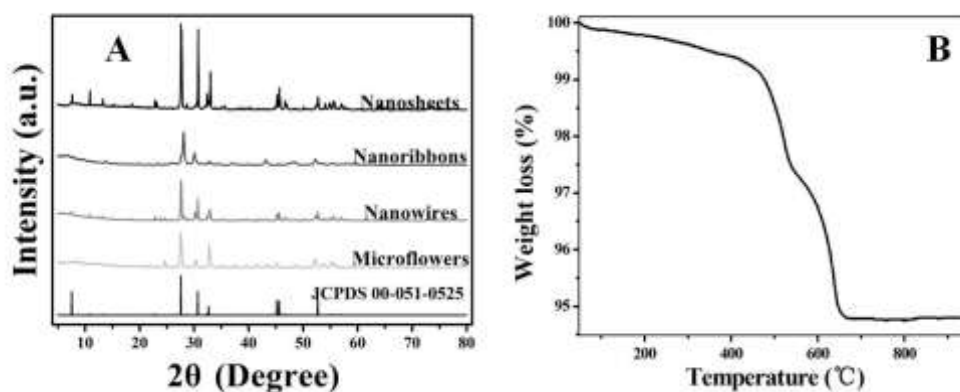

Fig. S2 A is X-ray diffraction spectra of the as-obtained microflowers, nanowires, nanoribbons, and nanosheets as well as standard spectrum of Bi<sub>5</sub>O<sub>7</sub>NO<sub>3</sub>. B is thermogravimetric analysis of the nanosheets randomly chosen.

Table 1 BET surface specific area of the as-obtained samples.

| Sample                  | Microflowers | Nanowires | Nanoribbons | Nanosheets |
|-------------------------|--------------|-----------|-------------|------------|
| BET (m <sup>2</sup> /g) | 2.37         | 8.25      | 4.20        | 5.23       |

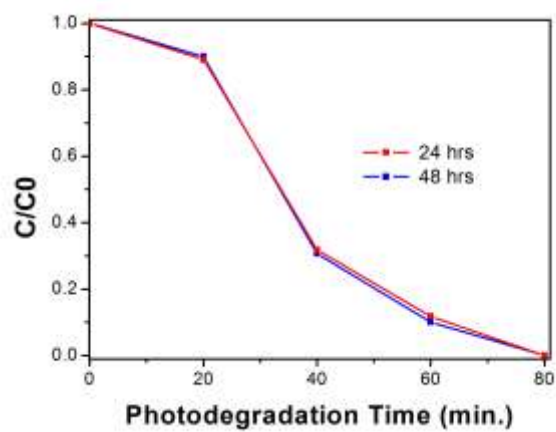

Fig. S3 RhB photodegradation of the nanosheets reacted for 24 hrs and 48 hrs respectively.

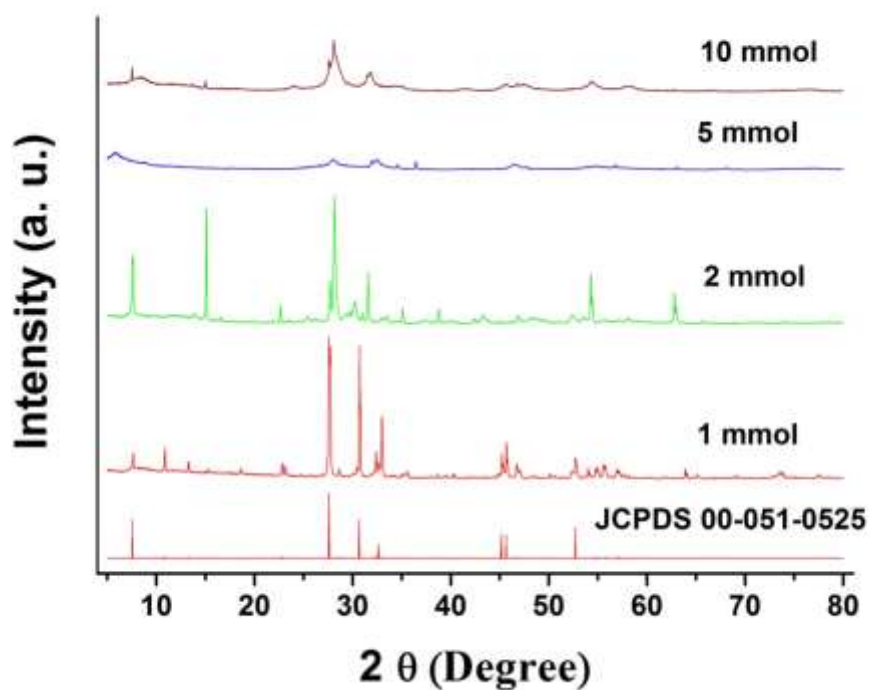

Fig. S4 XRD spectra of the samples obtained by mixing  $\text{Bi}(\text{NO}_3)_3$  and  $\text{Zn}(\text{Ac})_2$  with a mole ratio 2:1. The values in the diagram are corresponding to the added amount of  $\text{Bi}(\text{NO}_3)_3$ .

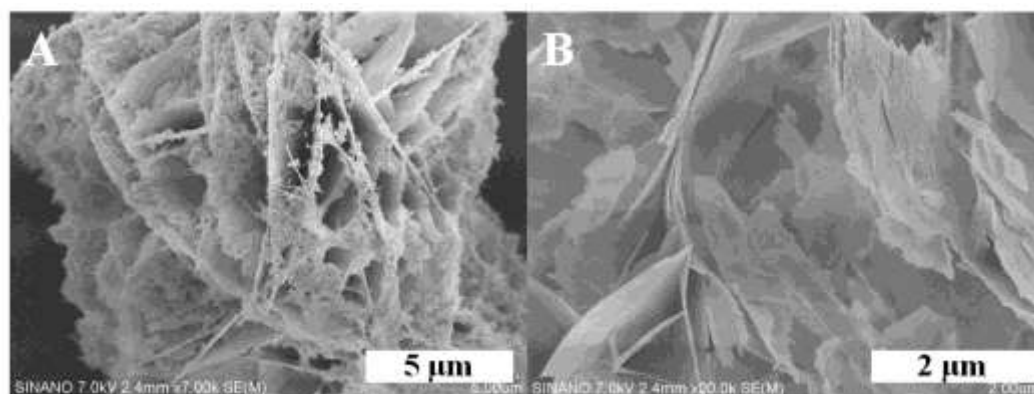

Fig. S5 SEM images of  $\text{Bi}_5\text{O}_7\text{NO}_3$  synthesized by mixing 5 mmol  $\text{Bi}(\text{NO}_3)_3$  and 5 mmol  $\text{KNO}_3$  (A), 5 mmol  $\text{Bi}(\text{NO}_3)_3$  and 5 mmol  $\text{Zn}(\text{NO}_3)_2$  (B).

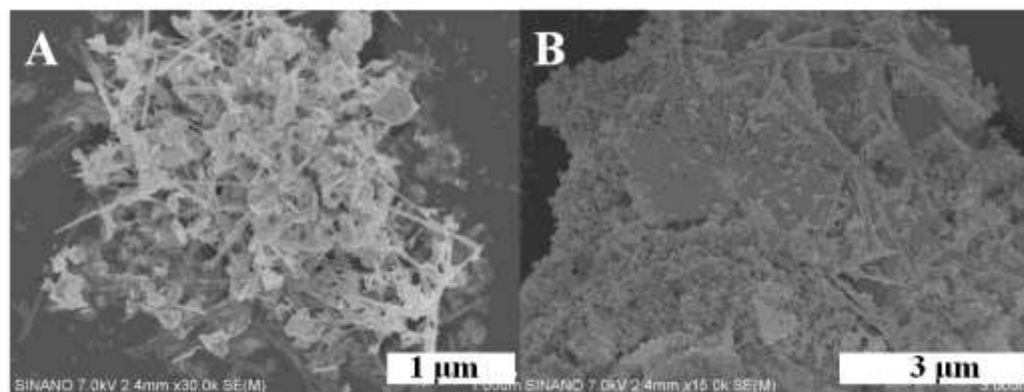

Fig. S6 SEM images of  $\text{Bi}_5\text{O}_7\text{NO}_3$  by adding 10 mL  $\text{NH}_3\cdot\text{H}_2\text{O}$  (A) and 2 mL  $\text{NH}_3\cdot\text{H}_2\text{O}$  (B), respectively.
